# Supplementary material for: Potential distribution of mosquito vector species in a primary malaria endemic region of Colombia
Source: PLOS journal article supplement (doi:10.1371/journal.pone.0179093), 2017-06-08
Supplement: S2 (10.1371/journal.pone.0179093.s002) [file journal.pone.0179093.s002]

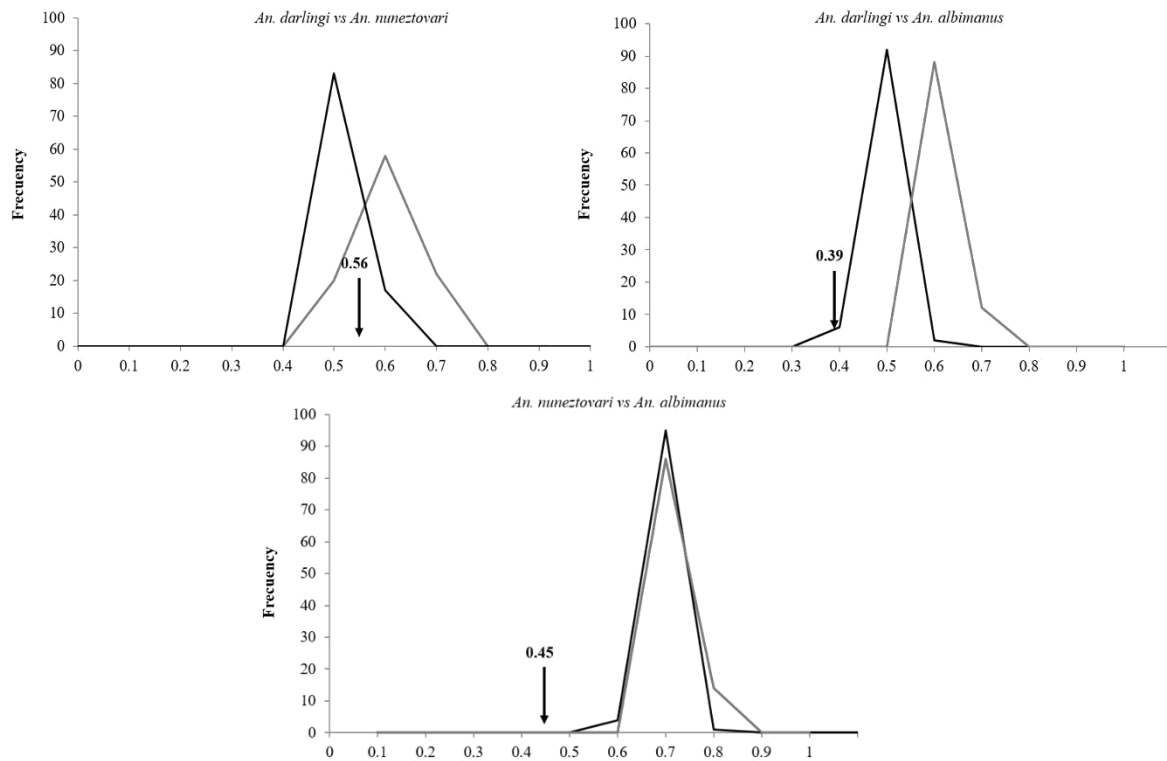

S1 Fig. Background similarity test. Lines represent the frequency of the values of the D index from 100 null models generated from random points (unit A vs. unit B, gray line; and unit B vs. Unit A, black line). Arrows indicate the observed D value in the overlap test (truly observed value between units A and B). Overlap values falling in or below the lower left 5% of the null distribution are interpreted as indicative of significant niche divergence.
